# Supplementary material for: What about electrochemical behaviors for aurivillius-phase bismuth tungstate? Capacitive or pseudocapacitive
Source: Royal Society of Chemistry journal article supplement (doi:10.1039/d3cp00166k), 2023-01-01
Supplement: d3cp00166k1.pdf [file d3cp00166k1.pdf]

## *Supporting Information*

### **What about Electrochemical Behaviors for Aurivillius-Phase Bismuth Tungstate? Capacitive or Pseudocapacitive**

Jian-Fei Gao <sup>1, 2, †</sup>, Jing-Feng Hou <sup>1, 2, †</sup>, Ling-Bin Kong <sup>1, 2, \*</sup>

<sup>1</sup> *State Key Laboratory of Advanced Processing and Recycling of Non-ferrous Metals, Lanzhou University of Technology, Lanzhou 730050, P. R. China*

<sup>2</sup> *School of Materials Science and Engineering, Lanzhou University of Technology, Lanzhou 730050, P. R. China*

\* Corresponding author: L.-B. Kong. E-mail: konglb@lut.edu.cn

† These authors contributed equally: Jian-Fei Gao, Jing-Feng Hou.

#### **1. Experimental**

##### **1.1 Chemicals and reagents**

All the reagents used in the experiment were of analytical grade and used without further purification. Bismuth nitrate pentahydrate ( $\text{Bi}(\text{NO}_3)_3 \cdot 5\text{H}_2\text{O}$ ) and Sodium Tungstate Dihydrate ( $\text{Na}_2\text{WO}_4 \cdot 2\text{H}_2\text{O}$ ) were purchased from Sinopharm Chemical Reagent Co. Ltd (Shanghai, China). Anhydrous ethanol ( $\text{C}_2\text{H}_5\text{OH}$ ) and concentrated sulfuric acid ( $\text{H}_2\text{SO}_4$ ) were purchased from Damao Chemical Reagent Factory (Tianjin, China). Steel mesh (99.99%, 1.7 mm) was purchased from Lizhiyuan Co, Ltd (Shanxi, China). Deionized

water with a resistivity of  $> 10.0 \text{ M}\Omega$  was used in experiments.

## 1.2 Electrochemical evaluation

The capacitive effects are characterized by analyzing the cyclic voltammetry data at various sweep rates according to:

$$i = av^b \quad (1)$$

where the measured current  $i$  obeys a power law relationship with the sweep rate  $v$ . Both  $a$  and  $b$  are adjustable parameters, with  $b$ -values determined from the slope of the plot of  $\log i$  vs  $\log v$ . In the eqn, the  $b$ -value is 0.5, the electrode material behaves as a battery property, while the  $b$ -value is 1, the electrode material exhibits pseudo-capacitance properties. And materials with the  $b$ -value in the range of 0.5-1 generally exhibit battery properties and pseudocapacitance properties.

Dunn et al. developed an approach to analyze the storage mechanism from the CV curve, where the current response at a fixed potential as being the combination of two separate mechanisms, surface capacitive effects and diffusion-controlled insertion processes:

$$i_{(V)} = k_1v + k_2v^{1/2} \quad (2)$$

Where  $i_{(V)}$  is the current response at a fixed potential,  $v$  is the sweep rate,  $k_1$  and  $k_2$  are constant at the fixed potential. For analytical purposes, we rearrange this slightly to

$$i(V)/v^{1/2} = k_1v^{1/2} + k_2 \quad (3)$$

In eq (3),  $k_1v$  and  $k_2v^{1/2}$  correspond to the current contributions from the surface

capacitive effects and the diffusion-controlled intercalation process, respectively. Thus, by determining  $k_1$  and  $k_2$ , we are able to quantify, at specific potentials, the fraction of the current due to each of these contributions.
